# Supplementary material
Source: PubMed Central journal article supplement (PMC64683)
Supplement: pnas_251367498_1.pdf [file pnas_251367498_1.pdf]

**Table 1. Free energy change as a function of mutation to alanine**

| Approximate location            | Residue               | $\Delta\Delta G_{\text{Mut}}$ |
|---------------------------------|-----------------------|-------------------------------|
| “Lipid-facing”<br>residues      | Ile <sup>77</sup> Ala | +0.1 ( $\pm 0.2$ )            |
|                                 | Phe <sup>78</sup> Ala | -0.1 ( $\pm 0.3$ )            |
|                                 | Met <sup>81</sup> Ala | -0.2 ( $\pm 0.1$ )            |
|                                 | Ile <sup>85</sup> Ala | -0.4 ( $\pm 0.1$ )            |
|                                 | Gly <sup>86</sup> Ala | -0.1 ( $\pm 0.2$ )            |
| “Helix-interaction”<br>residues | Leu <sup>75</sup> Ala | +1.3 ( $\pm 0.1$ )            |
|                                 | Ile <sup>76</sup> Ala | +1.8 ( $\pm 0.1$ )            |
|                                 | Gly <sup>79</sup> Ala | +1.7 ( $\pm 0.2$ )            |
|                                 | Val <sup>80</sup> Ala | +0.4 ( $\pm 0.2$ )            |
|                                 | Gly <sup>83</sup> Ala | +3.2 ( $\pm 0.2$ )            |
|                                 | Val <sup>84</sup> Ala | +1.0 ( $\pm 0.2$ )            |
|                                 | Thr <sup>87</sup> Ala | +0.9 ( $\pm 0.1$ )            |

These are the data plotted in Fig. 3.
